# Supplementary material
Source: MDPI journal article supplement (https://www.mdpi.com/2075-4701/10/11/1504)
Supplement: s1 [file s1]

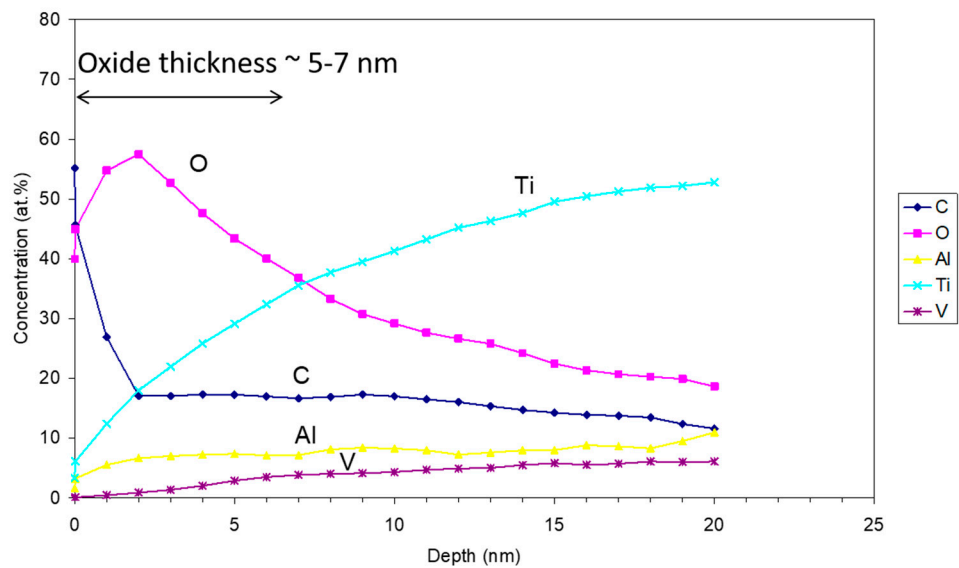

Figure S1: XPS depth profile of as-received Ti-6Al-4V sample.

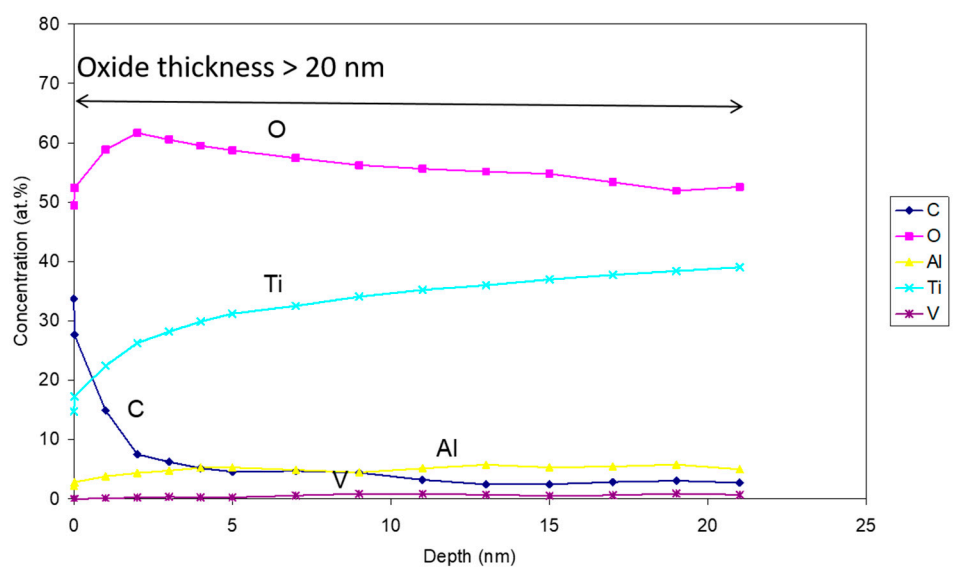

Figure S2: XPS depth profile of laser-textured Ti-6Al-4V sample with  $\Delta x = 100 \mu\text{m}$ .
